# Supplementary material for: Don’t worry, be active: how to facilitate the detection of errors in immersive virtual environments
Source: PeerJ. 2018 Oct 29;6:e5844. doi: 10.7717/peerj.5844 (PMC6211266; doi:10.7717/peerj.5844)
Supplement: Supplemental Information 1 [file peerj-06-5844-s001.xls]

## Sheet: Exp1_raw_data
Subj	Group	Age	Type of Error	Design Errors	Viewing Condition	Response
1	1	17	AE	AE1	Active	1
1	1	17	AE	AE2	Active	1
1	1	17	AE	AE3	Active	1
1	1	17	AE	AE4	Active	0
1	1	17	PE	PE1	Active	1
1	1	17	PE	PE2	Active	1
1	1	17	PE	PE3	Active	0
1	1	17	PE	PE4	Active	1
2	1	17	AE	AE1	Passive	0
2	1	17	AE	AE2	Passive	0
2	1	17	AE	AE3	Passive	1
2	1	17	AE	AE4	Passive	0
2	1	17	PE	PE1	Passive	1
2	1	17	PE	PE2	Passive	1
2	1	17	PE	PE3	Passive	0
2	1	17	PE	PE4	Passive	0
3	1	17	AE	AE1	Passive	0
3	1	17	AE	AE2	Passive	0
3	1	17	AE	AE3	Passive	1
3	1	17	AE	AE4	Passive	0
3	1	17	PE	PE1	Passive	1
3	1	17	PE	PE2	Passive	1
3	1	17	PE	PE3	Passive	0
3	1	17	PE	PE4	Passive	0
4	1	17	AE	AE1	Passive	1
4	1	17	AE	AE2	Passive	1
4	1	17	AE	AE3	Passive	1
4	1	17	AE	AE4	Passive	0
4	1	17	PE	PE1	Passive	1
4	1	17	PE	PE2	Passive	1
4	1	17	PE	PE3	Passive	0
4	1	17	PE	PE4	Passive	0
5	1	17	AE	AE1	Passive	1
5	1	17	AE	AE2	Passive	0
5	1	17	AE	AE3	Passive	0
5	1	17	AE	AE4	Passive	0
5	1	17	PE	PE1	Passive	1
5	1	17	PE	PE2	Passive	1
5	1	17	PE	PE3	Passive	1
5	1	17	PE	PE4	Passive	0
6	1	17	AE	AE1	Passive	0
6	1	17	AE	AE2	Passive	0
6	1	17	AE	AE3	Passive	0
6	1	17	AE	AE4	Passive	0
6	1	17	PE	PE1	Passive	1
6	1	17	PE	PE2	Passive	1
6	1	17	PE	PE3	Passive	0
6	1	17	PE	PE4	Passive	0
7	1	17	AE	AE1	Passive	0
7	1	17	AE	AE2	Passive	1
7	1	17	AE	AE3	Passive	0
7	1	17	AE	AE4	Passive	0
7	1	17	PE	PE1	Passive	1
7	1	17	PE	PE2	Passive	1
7	1	17	PE	PE3	Passive	1
7	1	17	PE	PE4	Passive	1
8	1	17	AE	AE1	Passive	0
8	1	17	AE	AE2	Passive	1
8	1	17	AE	AE3	Passive	0
8	1	17	AE	AE4	Passive	0
8	1	17	PE	PE1	Passive	1
8	1	17	PE	PE2	Passive	1
8	1	17	PE	PE3	Passive	1
8	1	17	PE	PE4	Passive	1
9	1	17	AE	AE1	Passive	0
9	1	17	AE	AE2	Passive	0
9	1	17	AE	AE3	Passive	0
9	1	17	AE	AE4	Passive	0
9	1	17	PE	PE1	Passive	1
9	1	17	PE	PE2	Passive	1
9	1	17	PE	PE3	Passive	0
9	1	17	PE	PE4	Passive	0
10	2	13	AE	AE1	Active	1
10	2	13	AE	AE2	Active	0
10	2	13	AE	AE3	Active	1
10	2	13	AE	AE4	Active	1
10	2	13	PE	PE1	Active	1
10	2	13	PE	PE2	Active	0
10	2	13	PE	PE3	Active	1
10	2	13	PE	PE4	Active	0
11	2	13	AE	AE1	Passive	1
11	2	13	AE	AE2	Passive	0
11	2	13	AE	AE3	Passive	1
11	2	13	AE	AE4	Passive	0
11	2	13	PE	PE1	Passive	1
11	2	13	PE	PE2	Passive	1
11	2	13	PE	PE3	Passive	1
11	2	13	PE	PE4	Passive	0
12	2	13	AE	AE1	Passive	0
12	2	13	AE	AE2	Passive	1
12	2	13	AE	AE3	Passive	0
12	2	13	AE	AE4	Passive	0
12	2	13	PE	PE1	Passive	1
12	2	13	PE	PE2	Passive	1
12	2	13	PE	PE3	Passive	1
12	2	13	PE	PE4	Passive	1
13	2	13	AE	AE1	Passive	0
13	2	13	AE	AE2	Passive	0
13	2	13	AE	AE3	Passive	0
13	2	13	AE	AE4	Passive	0
13	2	13	PE	PE1	Passive	1
13	2	13	PE	PE2	Passive	1
13	2	13	PE	PE3	Passive	1
13	2	13	PE	PE4	Passive	1
14	2	13	AE	AE1	Passive	0
14	2	13	AE	AE2	Passive	0
14	2	13	AE	AE3	Passive	0
14	2	13	AE	AE4	Passive	0
14	2	13	PE	PE1	Passive	1
14	2	13	PE	PE2	Passive	0
14	2	13	PE	PE3	Passive	1
14	2	13	PE	PE4	Passive	0
15	2	13	AE	AE1	Passive	0
15	2	13	AE	AE2	Passive	0
15	2	13	AE	AE3	Passive	0
15	2	13	AE	AE4	Passive	0
15	2	13	PE	PE1	Passive	1
15	2	13	PE	PE2	Passive	1
15	2	13	PE	PE3	Passive	1
15	2	13	PE	PE4	Passive	1
16	2	13	AE	AE1	Passive	1
16	2	13	AE	AE2	Passive	0
16	2	13	AE	AE3	Passive	0
16	2	13	AE	AE4	Passive	0
16	2	13	PE	PE1	Passive	1
16	2	13	PE	PE2	Passive	1
16	2	13	PE	PE3	Passive	1
16	2	13	PE	PE4	Passive	1
17	2	13	AE	AE1	Passive	1
17	2	13	AE	AE2	Passive	0
17	2	13	AE	AE3	Passive	0
17	2	13	AE	AE4	Passive	0
17	2	13	PE	PE1	Passive	1
17	2	13	PE	PE2	Passive	1
17	2	13	PE	PE3	Passive	1
17	2	13	PE	PE4	Passive	1
18	2	13	AE	AE1	Passive	0
18	2	13	AE	AE2	Passive	1
18	2	13	AE	AE3	Passive	0
18	2	13	AE	AE4	Passive	0
18	2	13	PE	PE1	Passive	1
18	2	13	PE	PE2	Passive	1
18	2	13	PE	PE3	Passive	0
18	2	13	PE	PE4	Passive	1
19	2	13	AE	AE1	Passive	1
19	2	13	AE	AE2	Passive	0
19	2	13	AE	AE3	Passive	0
19	2	13	AE	AE4	Passive	0
19	2	13	PE	PE1	Passive	1
19	2	13	PE	PE2	Passive	1
19	2	13	PE	PE3	Passive	1
19	2	13	PE	PE4	Passive	1
20	2	13	AE	AE1	Passive	0
20	2	13	AE	AE2	Passive	0
20	2	13	AE	AE3	Passive	0
20	2	13	AE	AE4	Passive	0
20	2	13	PE	PE1	Passive	1
20	2	13	PE	PE2	Passive	1
20	2	13	PE	PE3	Passive	1
20	2	13	PE	PE4	Passive	0
21	2	13	AE	AE1	Passive	1
21	2	13	AE	AE2	Passive	1
21	2	13	AE	AE3	Passive	1
21	2	13	AE	AE4	Passive	0
21	2	13	PE	PE1	Passive	1
21	2	13	PE	PE2	Passive	1
21	2	13	PE	PE3	Passive	1
21	2	13	PE	PE4	Passive	1
22	3	13	AE	AE1	Active	1
22	3	13	AE	AE2	Active	0
22	3	13	AE	AE3	Active	1
22	3	13	AE	AE4	Active	1
22	3	13	PE	PE1	Active	1
22	3	13	PE	PE2	Active	1
22	3	13	PE	PE3	Active	0
22	3	13	PE	PE4	Active	1
23	3	13	AE	AE1	Passive	1
23	3	13	AE	AE2	Passive	0
23	3	13	AE	AE3	Passive	1
23	3	13	AE	AE4	Passive	1
23	3	13	PE	PE1	Passive	1
23	3	13	PE	PE2	Passive	1
23	3	13	PE	PE3	Passive	0
23	3	13	PE	PE4	Passive	1
24	3	13	AE	AE1	Passive	1
24	3	13	AE	AE2	Passive	0
24	3	13	AE	AE3	Passive	0
24	3	13	AE	AE4	Passive	1
24	3	13	PE	PE1	Passive	1
24	3	13	PE	PE2	Passive	1
24	3	13	PE	PE3	Passive	1
24	3	13	PE	PE4	Passive	0
25	3	13	AE	AE1	Passive	0
25	3	13	AE	AE2	Passive	0
25	3	13	AE	AE3	Passive	0
25	3	13	AE	AE4	Passive	0
25	3	13	PE	PE1	Passive	1
25	3	13	PE	PE2	Passive	1
25	3	13	PE	PE3	Passive	1
25	3	13	PE	PE4	Passive	1
26	3	13	AE	AE1	Passive	1
26	3	13	AE	AE2	Passive	0
26	3	13	AE	AE3	Passive	1
26	3	13	AE	AE4	Passive	1
26	3	13	PE	PE1	Passive	1
26	3	13	PE	PE2	Passive	1
26	3	13	PE	PE3	Passive	1
26	3	13	PE	PE4	Passive	0
27	3	13	AE	AE1	Passive	1
27	3	13	AE	AE2	Passive	0
27	3	13	AE	AE3	Passive	1
27	3	13	AE	AE4	Passive	0
27	3	13	PE	PE1	Passive	1
27	3	13	PE	PE2	Passive	1
27	3	13	PE	PE3	Passive	1
27	3	13	PE	PE4	Passive	0
28	3	13	AE	AE1	Passive	1
28	3	13	AE	AE2	Passive	0
28	3	13	AE	AE3	Passive	1
28	3	13	AE	AE4	Passive	1
28	3	13	PE	PE1	Passive	1
28	3	13	PE	PE2	Passive	1
28	3	13	PE	PE3	Passive	1
28	3	13	PE	PE4	Passive	1
29	3	13	AE	AE1	Passive	0
29	3	13	AE	AE2	Passive	0
29	3	13	AE	AE3	Passive	1
29	3	13	AE	AE4	Passive	1
29	3	13	PE	PE1	Passive	1
29	3	13	PE	PE2	Passive	1
29	3	13	PE	PE3	Passive	1
29	3	13	PE	PE4	Passive	0
30	3	13	AE	AE1	Passive	1
30	3	13	AE	AE2	Passive	0
30	3	13	AE	AE3	Passive	1
30	3	13	AE	AE4	Passive	1
30	3	13	PE	PE1	Passive	1
30	3	13	PE	PE2	Passive	1
30	3	13	PE	PE3	Passive	1
30	3	13	PE	PE4	Passive	0
31	3	13	AE	AE1	Passive	1
31	3	13	AE	AE2	Passive	0
31	3	13	AE	AE3	Passive	1
31	3	13	AE	AE4	Passive	1
31	3	13	PE	PE1	Passive	1
31	3	13	PE	PE2	Passive	1
31	3	13	PE	PE3	Passive	1
31	3	13	PE	PE4	Passive	1
32	4	13	AE	AE1	Active	1
32	4	13	AE	AE2	Active	0
32	4	13	AE	AE3	Active	0
32	4	13	AE	AE4	Active	0
32	4	13	PE	PE1	Active	1
32	4	13	PE	PE2	Active	0
32	4	13	PE	PE3	Active	0
32	4	13	PE	PE4	Active	0
33	4	13	AE	AE1	Passive	1
33	4	13	AE	AE2	Passive	1
33	4	13	AE	AE3	Passive	1
33	4	13	AE	AE4	Passive	0
33	4	13	PE	PE1	Passive	1
33	4	13	PE	PE2	Passive	1
33	4	13	PE	PE3	Passive	0
33	4	13	PE	PE4	Passive	1
34	4	13	AE	AE1	Passive	1
34	4	13	AE	AE2	Passive	1
34	4	13	AE	AE3	Passive	0
34	4	13	AE	AE4	Passive	0
34	4	13	PE	PE1	Passive	1
34	4	13	PE	PE2	Passive	0
34	4	13	PE	PE3	Passive	0
34	4	13	PE	PE4	Passive	1
35	4	13	AE	AE1	Passive	1
35	4	13	AE	AE2	Passive	0
35	4	13	AE	AE3	Passive	0
35	4	13	AE	AE4	Passive	0
35	4	13	PE	PE1	Passive	0
35	4	13	PE	PE2	Passive	1
35	4	13	PE	PE3	Passive	0
35	4	13	PE	PE4	Passive	0
36	4	13	AE	AE1	Passive	1
36	4	13	AE	AE2	Passive	1
36	4	13	AE	AE3	Passive	1
36	4	13	AE	AE4	Passive	0
36	4	13	PE	PE1	Passive	1
36	4	13	PE	PE2	Passive	1
36	4	13	PE	PE3	Passive	0
36	4	13	PE	PE4	Passive	1
37	4	13	AE	AE1	Passive	0
37	4	13	AE	AE2	Passive	0
37	4	13	AE	AE3	Passive	0
37	4	13	AE	AE4	Passive	0
37	4	13	PE	PE1	Passive	1
37	4	13	PE	PE2	Passive	0
37	4	13	PE	PE3	Passive	0
37	4	13	PE	PE4	Passive	0
38	5	20	AE	AE1	Active	1
38	5	20	AE	AE2	Active	0
38	5	20	AE	AE3	Active	1
38	5	20	AE	AE4	Active	1
38	5	20	PE	PE1	Active	1
38	5	20	PE	PE2	Active	1
38	5	20	PE	PE3	Active	1
38	5	20	PE	PE4	Active	1
39	5	20	AE	AE1	Passive	1
39	5	20	AE	AE2	Passive	1
39	5	20	AE	AE3	Passive	1
39	5	20	AE	AE4	Passive	1
39	5	20	PE	PE1	Passive	1
39	5	20	PE	PE2	Passive	1
39	5	20	PE	PE3	Passive	1
39	5	20	PE	PE4	Passive	1
40	5	20	AE	AE1	Passive	1
40	5	20	AE	AE2	Passive	1
40	5	20	AE	AE3	Passive	1
40	5	20	AE	AE4	Passive	1
40	5	20	PE	PE1	Passive	1
40	5	20	PE	PE2	Passive	1
40	5	20	PE	PE3	Passive	0
40	5	20	PE	PE4	Passive	1
41	5	20	AE	AE1	Passive	0
41	5	20	AE	AE2	Passive	0
41	5	20	AE	AE3	Passive	0
41	5	20	AE	AE4	Passive	0
41	5	20	PE	PE1	Passive	1
41	5	20	PE	PE2	Passive	1
41	5	20	PE	PE3	Passive	0
41	5	20	PE	PE4	Passive	1
42	5	20	AE	AE1	Passive	0
42	5	20	AE	AE2	Passive	0
42	5	20	AE	AE3	Passive	1
42	5	20	AE	AE4	Passive	1
42	5	20	PE	PE1	Passive	1
42	5	20	PE	PE2	Passive	1
42	5	20	PE	PE3	Passive	0
42	5	20	PE	PE4	Passive	1
43	6	20	AE	AE1	Active	1
43	6	20	AE	AE2	Active	1
43	6	20	AE	AE3	Active	1
43	6	20	AE	AE4	Active	1
43	6	20	PE	PE1	Active	1
43	6	20	PE	PE2	Active	1
43	6	20	PE	PE3	Active	0
43	6	20	PE	PE4	Active	1
44	6	20	AE	AE1	Passive	1
44	6	20	AE	AE2	Passive	1
44	6	20	AE	AE3	Passive	1
44	6	20	AE	AE4	Passive	1
44	6	20	PE	PE1	Passive	1
44	6	20	PE	PE2	Passive	1
44	6	20	PE	PE3	Passive	0
44	6	20	PE	PE4	Passive	1
45	6	20	AE	AE1	Passive	1
45	6	20	AE	AE2	Passive	1
45	6	20	AE	AE3	Passive	1
45	6	20	AE	AE4	Passive	1
45	6	20	PE	PE1	Passive	1
45	6	20	PE	PE2	Passive	1
45	6	20	PE	PE3	Passive	0
45	6	20	PE	PE4	Passive	1
46	6	20	AE	AE1	Passive	1
46	6	20	AE	AE2	Passive	1
46	6	20	AE	AE3	Passive	1
46	6	20	AE	AE4	Passive	1
46	6	20	PE	PE1	Passive	1
46	6	20	PE	PE2	Passive	1
46	6	20	PE	PE3	Passive	0
46	6	20	PE	PE4	Passive	1
47	6	20	AE	AE1	Passive	0
47	6	20	AE	AE2	Passive	0
47	6	20	AE	AE3	Passive	0
47	6	20	AE	AE4	Passive	0
47	6	20	PE	PE1	Passive	1
47	6	20	PE	PE2	Passive	0
47	6	20	PE	PE3	Passive	0
47	6	20	PE	PE4	Passive	1
48	6	20	AE	AE1	Passive	1
48	6	20	AE	AE2	Passive	1
48	6	20	AE	AE3	Passive	1
48	6	20	AE	AE4	Passive	0
48	6	20	PE	PE1	Passive	0
48	6	20	PE	PE2	Passive	1
48	6	20	PE	PE3	Passive	0
48	6	20	PE	PE4	Passive	1
49	6	20	AE	AE1	Passive	1
49	6	20	AE	AE2	Passive	0
49	6	20	AE	AE3	Passive	0
49	6	20	AE	AE4	Passive	0
49	6	20	PE	PE1	Passive	1
49	6	20	PE	PE2	Passive	1
49	6	20	PE	PE3	Passive	0
49	6	20	PE	PE4	Passive	1
50	6	20	AE	AE1	Passive	1
50	6	20	AE	AE2	Passive	0
50	6	20	AE	AE3	Passive	1
50	6	20	AE	AE4	Passive	1
50	6	20	PE	PE1	Passive	1
50	6	20	PE	PE2	Passive	1
50	6	20	PE	PE3	Passive	0
50	6	20	PE	PE4	Passive	1
51	6	20	AE	AE1	Passive	1
51	6	20	AE	AE2	Passive	1
51	6	20	AE	AE3	Passive	0
51	6	20	AE	AE4	Passive	0
51	6	20	PE	PE1	Passive	1
51	6	20	PE	PE2	Passive	1
51	6	20	PE	PE3	Passive	0
51	6	20	PE	PE4	Passive	1
52	6	20	AE	AE1	Passive	0
52	6	20	AE	AE2	Passive	0
52	6	20	AE	AE3	Passive	0
52	6	20	AE	AE4	Passive	0
52	6	20	PE	PE1	Passive	1
52	6	20	PE	PE2	Passive	0
52	6	20	PE	PE3	Passive	0
52	6	20	PE	PE4	Passive	0
53	7	12	AE	AE1	Active	0
53	7	12	AE	AE2	Active	0
53	7	12	AE	AE3	Active	1
53	7	12	AE	AE4	Active	0
53	7	12	PE	PE1	Active	1
53	7	12	PE	PE2	Active	1
53	7	12	PE	PE3	Active	1
53	7	12	PE	PE4	Active	1
54	7	12	AE	AE1	Passive	1
54	7	12	AE	AE2	Passive	0
54	7	12	AE	AE3	Passive	1
54	7	12	AE	AE4	Passive	1
54	7	12	PE	PE1	Passive	1
54	7	12	PE	PE2	Passive	1
54	7	12	PE	PE3	Passive	1
54	7	12	PE	PE4	Passive	0
55	7	12	AE	AE1	Passive	1
55	7	12	AE	AE2	Passive	1
55	7	12	AE	AE3	Passive	1
55	7	12	AE	AE4	Passive	1
55	7	12	PE	PE1	Passive	1
55	7	12	PE	PE2	Passive	1
55	7	12	PE	PE3	Passive	1
55	7	12	PE	PE4	Passive	1
56	7	12	AE	AE1	Passive	1
56	7	12	AE	AE2	Passive	0
56	7	12	AE	AE3	Passive	1
56	7	12	AE	AE4	Passive	0
56	7	12	PE	PE1	Passive	1
56	7	12	PE	PE2	Passive	1
56	7	12	PE	PE3	Passive	0
56	7	12	PE	PE4	Passive	1
57	7	12	AE	AE1	Passive	1
57	7	12	AE	AE2	Passive	1
57	7	12	AE	AE3	Passive	1
57	7	12	AE	AE4	Passive	1
57	7	12	PE	PE1	Passive	1
57	7	12	PE	PE2	Passive	1
57	7	12	PE	PE3	Passive	1
57	7	12	PE	PE4	Passive	1
58	7	12	AE	AE1	Passive	1
58	7	12	AE	AE2	Passive	0
58	7	12	AE	AE3	Passive	1
58	7	12	AE	AE4	Passive	1
58	7	12	PE	PE1	Passive	1
58	7	12	PE	PE2	Passive	1
58	7	12	PE	PE3	Passive	1
58	7	12	PE	PE4	Passive	0
59	7	12	AE	AE1	Passive	1
59	7	12	AE	AE2	Passive	1
59	7	12	AE	AE3	Passive	1
59	7	12	AE	AE4	Passive	1
59	7	12	PE	PE1	Passive	1
59	7	12	PE	PE2	Passive	1
59	7	12	PE	PE3	Passive	1
59	7	12	PE	PE4	Passive	1
60	7	12	AE	AE1	Passive	1
60	7	12	AE	AE2	Passive	1
60	7	12	AE	AE3	Passive	1
60	7	12	AE	AE4	Passive	1
60	7	12	PE	PE1	Passive	1
60	7	12	PE	PE2	Passive	1
60	7	12	PE	PE3	Passive	1
60	7	12	PE	PE4	Passive	1
61	7	12	AE	AE1	Passive	1
61	7	12	AE	AE2	Passive	1
61	7	12	AE	AE3	Passive	1
61	7	12	AE	AE4	Passive	1
61	7	12	PE	PE1	Passive	1
61	7	12	PE	PE2	Passive	1
61	7	12	PE	PE3	Passive	1
61	7	12	PE	PE4	Passive	1
62	7	12	AE	AE1	Passive	1
62	7	12	AE	AE2	Passive	1
62	7	12	AE	AE3	Passive	1
62	7	12	AE	AE4	Passive	0
62	7	12	PE	PE1	Passive	1
62	7	12	PE	PE2	Passive	1
62	7	12	PE	PE3	Passive	1
62	7	12	PE	PE4	Passive	1
63	8	12	AE	AE1	Active	1
63	8	12	AE	AE2	Active	1
63	8	12	AE	AE3	Active	1
63	8	12	AE	AE4	Active	1
63	8	12	PE	PE1	Active	1
63	8	12	PE	PE2	Active	1
63	8	12	PE	PE3	Active	1
63	8	12	PE	PE4	Active	1
64	8	12	AE	AE1	Passive	1
64	8	12	AE	AE2	Passive	1
64	8	12	AE	AE3	Passive	1
64	8	12	AE	AE4	Passive	1
64	8	12	PE	PE1	Passive	1
64	8	12	PE	PE2	Passive	1
64	8	12	PE	PE3	Passive	1
64	8	12	PE	PE4	Passive	1
65	8	12	AE	AE1	Passive	1
65	8	12	AE	AE2	Passive	1
65	8	12	AE	AE3	Passive	1
65	8	12	AE	AE4	Passive	1
65	8	12	PE	PE1	Passive	1
65	8	12	PE	PE2	Passive	1
65	8	12	PE	PE3	Passive	1
65	8	12	PE	PE4	Passive	1
66	8	12	AE	AE1	Passive	0
66	8	12	AE	AE2	Passive	0
66	8	12	AE	AE3	Passive	0
66	8	12	AE	AE4	Passive	1
66	8	12	PE	PE1	Passive	1
66	8	12	PE	PE2	Passive	1
66	8	12	PE	PE3	Passive	1
66	8	12	PE	PE4	Passive	1
67	8	12	AE	AE1	Passive	1
67	8	12	AE	AE2	Passive	0
67	8	12	AE	AE3	Passive	0
67	8	12	AE	AE4	Passive	0
67	8	12	PE	PE1	Passive	1
67	8	12	PE	PE2	Passive	1
67	8	12	PE	PE3	Passive	1
67	8	12	PE	PE4	Passive	1
68	8	12	AE	AE1	Passive	1
68	8	12	AE	AE2	Passive	0
68	8	12	AE	AE3	Passive	1
68	8	12	AE	AE4	Passive	1
68	8	12	PE	PE1	Passive	1
68	8	12	PE	PE2	Passive	1
68	8	12	PE	PE3	Passive	1
68	8	12	PE	PE4	Passive	0
69	8	12	AE	AE1	Passive	1
69	8	12	AE	AE2	Passive	0
69	8	12	AE	AE3	Passive	1
69	8	12	AE	AE4	Passive	0
69	8	12	PE	PE1	Passive	1
69	8	12	PE	PE2	Passive	1
69	8	12	PE	PE3	Passive	1
69	8	12	PE	PE4	Passive	1
70	8	12	AE	AE1	Passive	1
70	8	12	AE	AE2	Passive	1
70	8	12	AE	AE3	Passive	1
70	8	12	AE	AE4	Passive	0
70	8	12	PE	PE1	Passive	1
70	8	12	PE	PE2	Passive	1
70	8	12	PE	PE3	Passive	1
70	8	12	PE	PE4	Passive	1
71	8	12	AE	AE1	Passive	1
71	8	12	AE	AE2	Passive	0
71	8	12	AE	AE3	Passive	0
71	8	12	AE	AE4	Passive	0
71	8	12	PE	PE1	Passive	1
71	8	12	PE	PE2	Passive	1
71	8	12	PE	PE3	Passive	1
71	8	12	PE	PE4	Passive	1
72	8	12	AE	AE1	Passive	1
72	8	12	AE	AE2	Passive	0
72	8	12	AE	AE3	Passive	0
72	8	12	AE	AE4	Passive	1
72	8	12	PE	PE1	Passive	1
72	8	12	PE	PE2	Passive	1
72	8	12	PE	PE3	Passive	1
72	8	12	PE	PE4	Passive	1
73	8	12	AE	AE1	Passive	1
73	8	12	AE	AE2	Passive	0
73	8	12	AE	AE3	Passive	1
73	8	12	AE	AE4	Passive	1
73	8	12	PE	PE1	Passive	1
73	8	12	PE	PE2	Passive	1
73	8	12	PE	PE3	Passive	1
73	8	12	PE	PE4	Passive	1
74	9	13	AE	AE1	Active	1
74	9	13	AE	AE2	Active	0
74	9	13	AE	AE3	Active	1
74	9	13	AE	AE4	Active	1
74	9	13	PE	PE1	Active	1
74	9	13	PE	PE2	Active	1
74	9	13	PE	PE3	Active	1
74	9	13	PE	PE4	Active	1
75	9	13	AE	AE1	Passive	1
75	9	13	AE	AE2	Passive	1
75	9	13	AE	AE3	Passive	1
75	9	13	AE	AE4	Passive	1
75	9	13	PE	PE1	Passive	1
75	9	13	PE	PE2	Passive	1
75	9	13	PE	PE3	Passive	1
75	9	13	PE	PE4	Passive	1
76	9	13	AE	AE1	Passive	1
76	9	13	AE	AE2	Passive	1
76	9	13	AE	AE3	Passive	1
76	9	13	AE	AE4	Passive	0
76	9	13	PE	PE1	Passive	1
76	9	13	PE	PE2	Passive	1
76	9	13	PE	PE3	Passive	1
76	9	13	PE	PE4	Passive	0
77	9	13	AE	AE1	Passive	1
77	9	13	AE	AE2	Passive	1
77	9	13	AE	AE3	Passive	1
77	9	13	AE	AE4	Passive	0
77	9	13	PE	PE1	Passive	1
77	9	13	PE	PE2	Passive	1
77	9	13	PE	PE3	Passive	1
77	9	13	PE	PE4	Passive	1
78	9	13	AE	AE1	Passive	0
78	9	13	AE	AE2	Passive	1
78	9	13	AE	AE3	Passive	1
78	9	13	AE	AE4	Passive	0
78	9	13	PE	PE1	Passive	1
78	9	13	PE	PE2	Passive	1
78	9	13	PE	PE3	Passive	1
78	9	13	PE	PE4	Passive	1
79	9	13	AE	AE1	Passive	1
79	9	13	AE	AE2	Passive	0
79	9	13	AE	AE3	Passive	1
79	9	13	AE	AE4	Passive	0
79	9	13	PE	PE1	Passive	1
79	9	13	PE	PE2	Passive	1
79	9	13	PE	PE3	Passive	1
79	9	13	PE	PE4	Passive	1
80	9	13	AE	AE1	Passive	1
80	9	13	AE	AE2	Passive	0
80	9	13	AE	AE3	Passive	0
80	9	13	AE	AE4	Passive	0
80	9	13	PE	PE1	Passive	0
80	9	13	PE	PE2	Passive	1
80	9	13	PE	PE3	Passive	0
80	9	13	PE	PE4	Passive	0
81	9	13	AE	AE1	Passive	1
81	9	13	AE	AE2	Passive	0
81	9	13	AE	AE3	Passive	0
81	9	13	AE	AE4	Passive	0
81	9	13	PE	PE1	Passive	0
81	9	13	PE	PE2	Passive	1
81	9	13	PE	PE3	Passive	1
81	9	13	PE	PE4	Passive	0
82	9	13	AE	AE1	Passive	1
82	9	13	AE	AE2	Passive	0
82	9	13	AE	AE3	Passive	0
82	9	13	AE	AE4	Passive	0
82	9	13	PE	PE1	Passive	1
82	9	13	PE	PE2	Passive	1
82	9	13	PE	PE3	Passive	1
82	9	13	PE	PE4	Passive	0
83	9	13	AE	AE1	Passive	1
83	9	13	AE	AE2	Passive	1
83	9	13	AE	AE3	Passive	0
83	9	13	AE	AE4	Passive	0
83	9	13	PE	PE1	Passive	1
83	9	13	PE	PE2	Passive	1
83	9	13	PE	PE3	Passive	0
83	9	13	PE	PE4	Passive	1
84	9	13	AE	AE1	Passive	1
84	9	13	AE	AE2	Passive	1
84	9	13	AE	AE3	Passive	0
84	9	13	AE	AE4	Passive	0
84	9	13	PE	PE1	Passive	1
84	9	13	PE	PE2	Passive	1
84	9	13	PE	PE3	Passive	1
84	9	13	PE	PE4	Passive	0
85	10	14	AE	AE1	Active	1
85	10	14	AE	AE2	Active	0
85	10	14	AE	AE3	Active	1
85	10	14	AE	AE4	Active	1
85	10	14	PE	PE1	Active	1
85	10	14	PE	PE2	Active	1
85	10	14	PE	PE3	Active	1
85	10	14	PE	PE4	Active	0
86	10	14	AE	AE1	Passive	1
86	10	14	AE	AE2	Passive	1
86	10	14	AE	AE3	Passive	1
86	10	14	AE	AE4	Passive	1
86	10	14	PE	PE1	Passive	1
86	10	14	PE	PE2	Passive	1
86	10	14	PE	PE3	Passive	0
86	10	14	PE	PE4	Passive	0
87	10	14	AE	AE1	Passive	1
87	10	14	AE	AE2	Passive	0
87	10	14	AE	AE3	Passive	0
87	10	14	AE	AE4	Passive	0
87	10	14	PE	PE1	Passive	1
87	10	14	PE	PE2	Passive	1
87	10	14	PE	PE3	Passive	0
87	10	14	PE	PE4	Passive	1
88	10	14	AE	AE1	Passive	0
88	10	14	AE	AE2	Passive	1
88	10	14	AE	AE3	Passive	1
88	10	14	AE	AE4	Passive	1
88	10	14	PE	PE1	Passive	1
88	10	14	PE	PE2	Passive	1
88	10	14	PE	PE3	Passive	1
88	10	14	PE	PE4	Passive	0
89	10	14	AE	AE1	Passive	1
89	10	14	AE	AE2	Passive	0
89	10	14	AE	AE3	Passive	1
89	10	14	AE	AE4	Passive	0
89	10	14	PE	PE1	Passive	1
89	10	14	PE	PE2	Passive	1
89	10	14	PE	PE3	Passive	1
89	10	14	PE	PE4	Passive	1
90	10	14	AE	AE1	Passive	1
90	10	14	AE	AE2	Passive	1
90	10	14	AE	AE3	Passive	0
90	10	14	AE	AE4	Passive	0
90	10	14	PE	PE1	Passive	1
90	10	14	PE	PE2	Passive	1
90	10	14	PE	PE3	Passive	1
90	10	14	PE	PE4	Passive	1
91	10	14	AE	AE1	Passive	1
91	10	14	AE	AE2	Passive	0
91	10	14	AE	AE3	Passive	1
91	10	14	AE	AE4	Passive	1
91	10	14	PE	PE1	Passive	1
91	10	14	PE	PE2	Passive	0
91	10	14	PE	PE3	Passive	1
91	10	14	PE	PE4	Passive	1
92	10	14	AE	AE1	Passive	1
92	10	14	AE	AE2	Passive	1
92	10	14	AE	AE3	Passive	0
92	10	14	AE	AE4	Passive	1
92	10	14	PE	PE1	Passive	1
92	10	14	PE	PE2	Passive	1
92	10	14	PE	PE3	Passive	1
92	10	14	PE	PE4	Passive	1
93	10	14	AE	AE1	Passive	1
93	10	14	AE	AE2	Passive	1
93	10	14	AE	AE3	Passive	1
93	10	14	AE	AE4	Passive	0
93	10	14	PE	PE1	Passive	1
93	10	14	PE	PE2	Passive	1
93	10	14	PE	PE3	Passive	1
93	10	14	PE	PE4	Passive	1
94	10	14	AE	AE1	Passive	1
94	10	14	AE	AE2	Passive	1
94	10	14	AE	AE3	Passive	0
94	10	14	AE	AE4	Passive	0
94	10	14	PE	PE1	Passive	1
94	10	14	PE	PE2	Passive	1
94	10	14	PE	PE3	Passive	1
94	10	14	PE	PE4	Passive	0
95	10	14	AE	AE1	Passive	1
95	10	14	AE	AE2	Passive	1
95	10	14	AE	AE3	Passive	0
95	10	14	AE	AE4	Passive	1
95	10	14	PE	PE1	Passive	1
95	10	14	PE	PE2	Passive	1
95	10	14	PE	PE3	Passive	1
95	10	14	PE	PE4	Passive	1

## Sheet: Exp2_raw_data
Subj	Group	Age	Gender	Type of Error	Design Errors	Viewing Condition	Response
1	1	19	f	AE	AE1	Passive	1
1	1	19	f	AE	AE2	Passive	1
1	1	19	f	AE	AE3	Passive	0
1	1	19	f	AE	AE4	Passive	1
1	1	19	f	PE	PE1	Passive	1
1	1	19	f	PE	PE2	Passive	1
1	1	19	f	PE	PE3	Passive	1
1	1	19	f	PE	PE4	Passive	1
2	1	19	f	AE	AE1	Passive	0
2	1	19	f	AE	AE2	Passive	0
2	1	19	f	AE	AE3	Passive	0
2	1	19	f	AE	AE4	Passive	0
2	1	19	f	PE	PE1	Passive	1
2	1	19	f	PE	PE2	Passive	1
2	1	19	f	PE	PE3	Passive	0
2	1	19	f	PE	PE4	Passive	1
3	1	19	f	AE	AE1	Passive	0
3	1	19	f	AE	AE2	Passive	0
3	1	19	f	AE	AE3	Passive	0
3	1	19	f	AE	AE4	Passive	0
3	1	19	f	PE	PE1	Passive	1
3	1	19	f	PE	PE2	Passive	1
3	1	19	f	PE	PE3	Passive	0
3	1	19	f	PE	PE4	Passive	1
4	1	19	f	AE	AE1	Passive	1
4	1	19	f	AE	AE2	Passive	1
4	1	19	f	AE	AE3	Passive	1
4	1	19	f	AE	AE4	Passive	1
4	1	19	f	PE	PE1	Passive	0
4	1	19	f	PE	PE2	Passive	1
4	1	19	f	PE	PE3	Passive	0
4	1	19	f	PE	PE4	Passive	0
5	1	20	f	AE	AE1	Active	1
5	1	20	f	AE	AE2	Active	1
5	1	20	f	AE	AE3	Active	0
5	1	20	f	AE	AE4	Active	0
5	1	20	f	PE	PE1	Active	1
5	1	20	f	PE	PE2	Active	1
5	1	20	f	PE	PE3	Active	1
5	1	20	f	PE	PE4	Active	1
6	1	19	f	AE	AE1	Passive	0
6	1	19	f	AE	AE2	Passive	0
6	1	19	f	AE	AE3	Passive	0
6	1	19	f	AE	AE4	Passive	0
6	1	19	f	PE	PE1	Passive	1
6	1	19	f	PE	PE2	Passive	0
6	1	19	f	PE	PE3	Passive	0
6	1	19	f	PE	PE4	Passive	0
7	1	29	f	AE	AE1	Passive	0
7	1	29	f	AE	AE2	Passive	0
7	1	29	f	AE	AE3	Passive	0
7	1	29	f	AE	AE4	Passive	0
7	1	29	f	PE	PE1	Passive	1
7	1	29	f	PE	PE2	Passive	1
7	1	29	f	PE	PE3	Passive	0
7	1	29	f	PE	PE4	Passive	1
8	2	19	f	AE	AE1	Passive	0
8	2	19	f	AE	AE2	Passive	0
8	2	19	f	AE	AE3	Passive	0
8	2	19	f	AE	AE4	Passive	0
8	2	19	f	PE	PE1	Passive	1
8	2	19	f	PE	PE2	Passive	0
8	2	19	f	PE	PE3	Passive	0
8	2	19	f	PE	PE4	Passive	1
9	2	20	f	AE	AE1	Passive	1
9	2	20	f	AE	AE2	Passive	1
9	2	20	f	AE	AE3	Passive	1
9	2	20	f	AE	AE4	Passive	0
9	2	20	f	PE	PE1	Passive	1
9	2	20	f	PE	PE2	Passive	1
9	2	20	f	PE	PE3	Passive	0
9	2	20	f	PE	PE4	Passive	0
10	2	20	f	AE	AE1	Passive	0
10	2	20	f	AE	AE2	Passive	0
10	2	20	f	AE	AE3	Passive	0
10	2	20	f	AE	AE4	Passive	0
10	2	20	f	PE	PE1	Passive	1
10	2	20	f	PE	PE2	Passive	0
10	2	20	f	PE	PE3	Passive	0
10	2	20	f	PE	PE4	Passive	0
11	2	18	f	AE	AE1	Active	0
11	2	18	f	AE	AE2	Active	1
11	2	18	f	AE	AE3	Active	0
11	2	18	f	AE	AE4	Active	0
11	2	18	f	PE	PE1	Active	1
11	2	18	f	PE	PE2	Active	1
11	2	18	f	PE	PE3	Active	0
11	2	18	f	PE	PE4	Active	1
12	2	NA	f	AE	AE1	Passive	0
12	2	NA	f	AE	AE2	Passive	0
12	2	NA	f	AE	AE3	Passive	0
12	2	NA	f	AE	AE4	Passive	0
12	2	NA	f	PE	PE1	Passive	1
12	2	NA	f	PE	PE2	Passive	0
12	2	NA	f	PE	PE3	Passive	0
12	2	NA	f	PE	PE4	Passive	0
13	2	19	f	AE	AE1	Passive	1
13	2	19	f	AE	AE2	Passive	0
13	2	19	f	AE	AE3	Passive	1
13	2	19	f	AE	AE4	Passive	1
13	2	19	f	PE	PE1	Passive	1
13	2	19	f	PE	PE2	Passive	1
13	2	19	f	PE	PE3	Passive	0
13	2	19	f	PE	PE4	Passive	0
14	2	18	f	AE	AE1	Passive	0
14	2	18	f	AE	AE2	Passive	0
14	2	18	f	AE	AE3	Passive	1
14	2	18	f	AE	AE4	Passive	0
14	2	18	f	PE	PE1	Passive	1
14	2	18	f	PE	PE2	Passive	1
14	2	18	f	PE	PE3	Passive	1
14	2	18	f	PE	PE4	Passive	1
15	3	18	f	AE	AE1	Passive	0
15	3	18	f	AE	AE2	Passive	1
15	3	18	f	AE	AE3	Passive	0
15	3	18	f	AE	AE4	Passive	0
15	3	18	f	PE	PE1	Passive	1
15	3	18	f	PE	PE2	Passive	1
15	3	18	f	PE	PE3	Passive	0
15	3	18	f	PE	PE4	Passive	0
16	3	19	f	AE	AE1	Passive	0
16	3	19	f	AE	AE2	Passive	0
16	3	19	f	AE	AE3	Passive	0
16	3	19	f	AE	AE4	Passive	0
16	3	19	f	PE	PE1	Passive	1
16	3	19	f	PE	PE2	Passive	1
16	3	19	f	PE	PE3	Passive	0
16	3	19	f	PE	PE4	Passive	0
17	3	19	f	AE	AE1	Active	0
17	3	19	f	AE	AE2	Active	0
17	3	19	f	AE	AE3	Active	0
17	3	19	f	AE	AE4	Active	0
17	3	19	f	PE	PE1	Active	0
17	3	19	f	PE	PE2	Active	1
17	3	19	f	PE	PE3	Active	0
17	3	19	f	PE	PE4	Active	0
18	3	19	f	AE	AE1	Passive	0
18	3	19	f	AE	AE2	Passive	0
18	3	19	f	AE	AE3	Passive	0
18	3	19	f	AE	AE4	Passive	0
18	3	19	f	PE	PE1	Passive	1
18	3	19	f	PE	PE2	Passive	1
18	3	19	f	PE	PE3	Passive	0
18	3	19	f	PE	PE4	Passive	0
19	3	19	f	AE	AE1	Passive	0
19	3	19	f	AE	AE2	Passive	0
19	3	19	f	AE	AE3	Passive	0
19	3	19	f	AE	AE4	Passive	0
19	3	19	f	PE	PE1	Passive	1
19	3	19	f	PE	PE2	Passive	1
19	3	19	f	PE	PE3	Passive	0
19	3	19	f	PE	PE4	Passive	0
20	3	19	f	AE	AE1	Passive	0
20	3	19	f	AE	AE2	Passive	1
20	3	19	f	AE	AE3	Passive	0
20	3	19	f	AE	AE4	Passive	0
20	3	19	f	PE	PE1	Passive	0
20	3	19	f	PE	PE2	Passive	0
20	3	19	f	PE	PE3	Passive	1
20	3	19	f	PE	PE4	Passive	1
21	4	20	f	AE	AE1	Passive	0
21	4	20	f	AE	AE2	Passive	0
21	4	20	f	AE	AE3	Passive	0
21	4	20	f	AE	AE4	Passive	0
21	4	20	f	PE	PE1	Passive	1
21	4	20	f	PE	PE2	Passive	1
21	4	20	f	PE	PE3	Passive	0
21	4	20	f	PE	PE4	Passive	0
22	4	20	f	AE	AE1	Passive	0
22	4	20	f	AE	AE2	Passive	0
22	4	20	f	AE	AE3	Passive	0
22	4	20	f	AE	AE4	Passive	0
22	4	20	f	PE	PE1	Passive	0
22	4	20	f	PE	PE2	Passive	1
22	4	20	f	PE	PE3	Passive	0
22	4	20	f	PE	PE4	Passive	0
23	4	19	f	AE	AE1	Passive	0
23	4	19	f	AE	AE2	Passive	1
23	4	19	f	AE	AE3	Passive	0
23	4	19	f	AE	AE4	Passive	0
23	4	19	f	PE	PE1	Passive	0
23	4	19	f	PE	PE2	Passive	1
23	4	19	f	PE	PE3	Passive	0
23	4	19	f	PE	PE4	Passive	0
24	4	19	f	AE	AE1	Passive	0
24	4	19	f	AE	AE2	Passive	1
24	4	19	f	AE	AE3	Passive	0
24	4	19	f	AE	AE4	Passive	0
24	4	19	f	PE	PE1	Passive	1
24	4	19	f	PE	PE2	Passive	0
24	4	19	f	PE	PE3	Passive	0
24	4	19	f	PE	PE4	Passive	0
25	4	19	f	AE	AE1	Passive	0
25	4	19	f	AE	AE2	Passive	0
25	4	19	f	AE	AE3	Passive	0
25	4	19	f	AE	AE4	Passive	0
25	4	19	f	PE	PE1	Passive	1
25	4	19	f	PE	PE2	Passive	0
25	4	19	f	PE	PE3	Passive	1
25	4	19	f	PE	PE4	Passive	0
26	4	NA	f	AE	AE1	Passive	0
26	4	NA	f	AE	AE2	Passive	1
26	4	NA	f	AE	AE3	Passive	0
26	4	NA	f	AE	AE4	Passive	0
26	4	NA	f	PE	PE1	Passive	1
26	4	NA	f	PE	PE2	Passive	0
26	4	NA	f	PE	PE3	Passive	0
26	4	NA	f	PE	PE4	Passive	1
27	4	19	m	AE	AE1	Passive	0
27	4	19	m	AE	AE2	Passive	0
27	4	19	m	AE	AE3	Passive	0
27	4	19	m	AE	AE4	Passive	0
27	4	19	m	PE	PE1	Passive	1
27	4	19	m	PE	PE2	Passive	1
27	4	19	m	PE	PE3	Passive	0
27	4	19	m	PE	PE4	Passive	1
28	4	20	m	AE	AE1	Active	1
28	4	20	m	AE	AE2	Active	0
28	4	20	m	AE	AE3	Active	0
28	4	20	m	AE	AE4	Active	0
28	4	20	m	PE	PE1	Active	1
28	4	20	m	PE	PE2	Active	1
28	4	20	m	PE	PE3	Active	0
28	4	20	m	PE	PE4	Active	1
29	5	19	f	AE	AE1	Passive	0
29	5	19	f	AE	AE2	Passive	0
29	5	19	f	AE	AE3	Passive	0
29	5	19	f	AE	AE4	Passive	0
29	5	19	f	PE	PE1	Passive	1
29	5	19	f	PE	PE2	Passive	1
29	5	19	f	PE	PE3	Passive	0
29	5	19	f	PE	PE4	Passive	0
30	5	20	f	AE	AE1	Passive	0
30	5	20	f	AE	AE2	Passive	0
30	5	20	f	AE	AE3	Passive	0
30	5	20	f	AE	AE4	Passive	0
30	5	20	f	PE	PE1	Passive	1
30	5	20	f	PE	PE2	Passive	1
30	5	20	f	PE	PE3	Passive	0
30	5	20	f	PE	PE4	Passive	0
31	5	21	f	AE	AE1	Active	1
31	5	21	f	AE	AE2	Active	1
31	5	21	f	AE	AE3	Active	1
31	5	21	f	AE	AE4	Active	0
31	5	21	f	PE	PE1	Active	1
31	5	21	f	PE	PE2	Active	0
31	5	21	f	PE	PE3	Active	0
31	5	21	f	PE	PE4	Active	0
32	5	19	f	AE	AE1	Passive	0
32	5	19	f	AE	AE2	Passive	1
32	5	19	f	AE	AE3	Passive	0
32	5	19	f	AE	AE4	Passive	0
32	5	19	f	PE	PE1	Passive	1
32	5	19	f	PE	PE2	Passive	1
32	5	19	f	PE	PE3	Passive	1
32	5	19	f	PE	PE4	Passive	1
33	5	18	f	AE	AE1	Passive	0
33	5	18	f	AE	AE2	Passive	0
33	5	18	f	AE	AE3	Passive	0
33	5	18	f	AE	AE4	Passive	0
33	5	18	f	PE	PE1	Passive	1
33	5	18	f	PE	PE2	Passive	1
33	5	18	f	PE	PE3	Passive	0
33	5	18	f	PE	PE4	Passive	1
34	5	19	f	AE	AE1	Passive	0
34	5	19	f	AE	AE2	Passive	0
34	5	19	f	AE	AE3	Passive	0
34	5	19	f	AE	AE4	Passive	0
34	5	19	f	PE	PE1	Passive	1
34	5	19	f	PE	PE2	Passive	1
34	5	19	f	PE	PE3	Passive	1
34	5	19	f	PE	PE4	Passive	1
35	6	19	m	AE	AE1	Passive	0
35	6	19	m	AE	AE2	Passive	0
35	6	19	m	AE	AE3	Passive	0
35	6	19	m	AE	AE4	Passive	0
35	6	19	m	PE	PE1	Passive	1
35	6	19	m	PE	PE2	Passive	1
35	6	19	m	PE	PE3	Passive	1
35	6	19	m	PE	PE4	Passive	0
36	6	21	f	AE	AE1	Passive	0
36	6	21	f	AE	AE2	Passive	1
36	6	21	f	AE	AE3	Passive	0
36	6	21	f	AE	AE4	Passive	0
36	6	21	f	PE	PE1	Passive	1
36	6	21	f	PE	PE2	Passive	0
36	6	21	f	PE	PE3	Passive	0
36	6	21	f	PE	PE4	Passive	1
37	6	19	f	AE	AE1	Passive	1
37	6	19	f	AE	AE2	Passive	1
37	6	19	f	AE	AE3	Passive	0
37	6	19	f	AE	AE4	Passive	0
37	6	19	f	PE	PE1	Passive	1
37	6	19	f	PE	PE2	Passive	1
37	6	19	f	PE	PE3	Passive	1
37	6	19	f	PE	PE4	Passive	1
38	6	24	f	AE	AE1	Passive	0
38	6	24	f	AE	AE2	Passive	0
38	6	24	f	AE	AE3	Passive	0
38	6	24	f	AE	AE4	Passive	0
38	6	24	f	PE	PE1	Passive	1
38	6	24	f	PE	PE2	Passive	1
38	6	24	f	PE	PE3	Passive	0
38	6	24	f	PE	PE4	Passive	0
39	6	21	f	AE	AE1	Passive	0
39	6	21	f	AE	AE2	Passive	1
39	6	21	f	AE	AE3	Passive	1
39	6	21	f	AE	AE4	Passive	0
39	6	21	f	PE	PE1	Passive	1
39	6	21	f	PE	PE2	Passive	1
39	6	21	f	PE	PE3	Passive	0
39	6	21	f	PE	PE4	Passive	0
40	6	20	m	AE	AE1	Passive	1
40	6	20	m	AE	AE2	Passive	1
40	6	20	m	AE	AE3	Passive	0
40	6	20	m	AE	AE4	Passive	0
40	6	20	m	PE	PE1	Passive	1
40	6	20	m	PE	PE2	Passive	0
40	6	20	m	PE	PE3	Passive	0
40	6	20	m	PE	PE4	Passive	1
41	6	19	m	AE	AE1	Active	1
41	6	19	m	AE	AE2	Active	1
41	6	19	m	AE	AE3	Active	0
41	6	19	m	AE	AE4	Active	0
41	6	19	m	PE	PE1	Active	1
41	6	19	m	PE	PE2	Active	1
41	6	19	m	PE	PE3	Active	1
41	6	19	m	PE	PE4	Active	1
42	7	22	f	AE	AE1	Active	0
42	7	22	f	AE	AE2	Active	0
42	7	22	f	AE	AE3	Active	0
42	7	22	f	AE	AE4	Active	0
42	7	22	f	PE	PE1	Active	1
42	7	22	f	PE	PE2	Active	1
42	7	22	f	PE	PE3	Active	1
42	7	22	f	PE	PE4	Active	0
43	7	20	m	AE	AE1	Passive	0
43	7	20	m	AE	AE2	Passive	0
43	7	20	m	AE	AE3	Passive	0
43	7	20	m	AE	AE4	Passive	0
43	7	20	m	PE	PE1	Passive	1
43	7	20	m	PE	PE2	Passive	0
43	7	20	m	PE	PE3	Passive	0
43	7	20	m	PE	PE4	Passive	0
44	7	19	m	AE	AE1	Passive	0
44	7	19	m	AE	AE2	Passive	1
44	7	19	m	AE	AE3	Passive	0
44	7	19	m	AE	AE4	Passive	0
44	7	19	m	PE	PE1	Passive	1
44	7	19	m	PE	PE2	Passive	1
44	7	19	m	PE	PE3	Passive	0
44	7	19	m	PE	PE4	Passive	0
45	7	19	f	AE	AE1	Passive	0
45	7	19	f	AE	AE2	Passive	1
45	7	19	f	AE	AE3	Passive	0
45	7	19	f	AE	AE4	Passive	0
45	7	19	f	PE	PE1	Passive	1
45	7	19	f	PE	PE2	Passive	1
45	7	19	f	PE	PE3	Passive	0
45	7	19	f	PE	PE4	Passive	1
46	7	19	m	AE	AE1	Passive	0
46	7	19	m	AE	AE2	Passive	1
46	7	19	m	AE	AE3	Passive	0
46	7	19	m	AE	AE4	Passive	0
46	7	19	m	PE	PE1	Passive	1
46	7	19	m	PE	PE2	Passive	1
46	7	19	m	PE	PE3	Passive	0
46	7	19	m	PE	PE4	Passive	0
47	8	19	f	AE	AE1	Passive	0
47	8	19	f	AE	AE2	Passive	1
47	8	19	f	AE	AE3	Passive	1
47	8	19	f	AE	AE4	Passive	0
47	8	19	f	PE	PE1	Passive	1
47	8	19	f	PE	PE2	Passive	1
47	8	19	f	PE	PE3	Passive	1
47	8	19	f	PE	PE4	Passive	1
48	8	19	f	AE	AE1	Passive	0
48	8	19	f	AE	AE2	Passive	0
48	8	19	f	AE	AE3	Passive	1
48	8	19	f	AE	AE4	Passive	0
48	8	19	f	PE	PE1	Passive	1
48	8	19	f	PE	PE2	Passive	1
48	8	19	f	PE	PE3	Passive	0
48	8	19	f	PE	PE4	Passive	1
49	8	20	f	AE	AE1	Active	0
49	8	20	f	AE	AE2	Active	1
49	8	20	f	AE	AE3	Active	1
49	8	20	f	AE	AE4	Active	0
49	8	20	f	PE	PE1	Active	1
49	8	20	f	PE	PE2	Active	1
49	8	20	f	PE	PE3	Active	1
49	8	20	f	PE	PE4	Active	1
50	8	19	f	AE	AE1	Passive	0
50	8	19	f	AE	AE2	Passive	1
50	8	19	f	AE	AE3	Passive	1
50	8	19	f	AE	AE4	Passive	1
50	8	19	f	PE	PE1	Passive	0
50	8	19	f	PE	PE2	Passive	1
50	8	19	f	PE	PE3	Passive	1
50	8	19	f	PE	PE4	Passive	0
51	8	19	f	AE	AE1	Passive	0
51	8	19	f	AE	AE2	Passive	0
51	8	19	f	AE	AE3	Passive	0
51	8	19	f	AE	AE4	Passive	0
51	8	19	f	PE	PE1	Passive	0
51	8	19	f	PE	PE2	Passive	1
51	8	19	f	PE	PE3	Passive	0
51	8	19	f	PE	PE4	Passive	0
52	8	18	f	AE	AE1	Passive	0
52	8	18	f	AE	AE2	Passive	1
52	8	18	f	AE	AE3	Passive	0
52	8	18	f	AE	AE4	Passive	1
52	8	18	f	PE	PE1	Passive	0
52	8	18	f	PE	PE2	Passive	1
52	8	18	f	PE	PE3	Passive	1
52	8	18	f	PE	PE4	Passive	1
53	9	19	f	AE	AE1	Active	0
53	9	19	f	AE	AE2	Active	1
53	9	19	f	AE	AE3	Active	0
53	9	19	f	AE	AE4	Active	0
53	9	19	f	PE	PE1	Active	1
53	9	19	f	PE	PE2	Active	1
53	9	19	f	PE	PE3	Active	0
53	9	19	f	PE	PE4	Active	0
54	9	19	f	AE	AE1	Passive	0
54	9	19	f	AE	AE2	Passive	0
54	9	19	f	AE	AE3	Passive	0
54	9	19	f	AE	AE4	Passive	0
54	9	19	f	PE	PE1	Passive	0
54	9	19	f	PE	PE2	Passive	1
54	9	19	f	PE	PE3	Passive	0
54	9	19	f	PE	PE4	Passive	0
55	9	23	m	AE	AE1	Passive	0
55	9	23	m	AE	AE2	Passive	0
55	9	23	m	AE	AE3	Passive	0
55	9	23	m	AE	AE4	Passive	0
55	9	23	m	PE	PE1	Passive	1
55	9	23	m	PE	PE2	Passive	0
55	9	23	m	PE	PE3	Passive	0
55	9	23	m	PE	PE4	Passive	0
56	9	19	m	AE	AE1	Passive	0
56	9	19	m	AE	AE2	Passive	0
56	9	19	m	AE	AE3	Passive	0
56	9	19	m	AE	AE4	Passive	0
56	9	19	m	PE	PE1	Passive	1
56	9	19	m	PE	PE2	Passive	1
56	9	19	m	PE	PE3	Passive	0
56	9	19	m	PE	PE4	Passive	0
57	9	24	m	AE	AE1	Passive	0
57	9	24	m	AE	AE2	Passive	0
57	9	24	m	AE	AE3	Passive	0
57	9	24	m	AE	AE4	Passive	0
57	9	24	m	PE	PE1	Passive	1
57	9	24	m	PE	PE2	Passive	1
57	9	24	m	PE	PE3	Passive	0
57	9	24	m	PE	PE4	Passive	0
58	9	19	f	AE	AE1	Passive	0
58	9	19	f	AE	AE2	Passive	0
58	9	19	f	AE	AE3	Passive	0
58	9	19	f	AE	AE4	Passive	0
58	9	19	f	PE	PE1	Passive	1
58	9	19	f	PE	PE2	Passive	0
58	9	19	f	PE	PE3	Passive	0
58	9	19	f	PE	PE4	Passive	1
59	9	19	f	AE	AE1	Passive	0
59	9	19	f	AE	AE2	Passive	0
59	9	19	f	AE	AE3	Passive	0
59	9	19	f	AE	AE4	Passive	0
59	9	19	f	PE	PE1	Passive	1
59	9	19	f	PE	PE2	Passive	1
59	9	19	f	PE	PE3	Passive	0
59	9	19	f	PE	PE4	Passive	0
60	10	23	m	AE	AE1	Passive	0
60	10	23	m	AE	AE2	Passive	0
60	10	23	m	AE	AE3	Passive	0
60	10	23	m	AE	AE4	Passive	0
60	10	23	m	PE	PE1	Passive	1
60	10	23	m	PE	PE2	Passive	0
60	10	23	m	PE	PE3	Passive	0
60	10	23	m	PE	PE4	Passive	1
61	10	19	f	AE	AE1	Passive	0
61	10	19	f	AE	AE2	Passive	0
61	10	19	f	AE	AE3	Passive	0
61	10	19	f	AE	AE4	Passive	1
61	10	19	f	PE	PE1	Passive	1
61	10	19	f	PE	PE2	Passive	1
61	10	19	f	PE	PE3	Passive	0
61	10	19	f	PE	PE4	Passive	1
62	10	20	f	AE	AE1	Passive	0
62	10	20	f	AE	AE2	Passive	1
62	10	20	f	AE	AE3	Passive	1
62	10	20	f	AE	AE4	Passive	1
62	10	20	f	PE	PE1	Passive	0
62	10	20	f	PE	PE2	Passive	1
62	10	20	f	PE	PE3	Passive	0
62	10	20	f	PE	PE4	Passive	1
63	10	20	f	AE	AE1	Passive	1
63	10	20	f	AE	AE2	Passive	1
63	10	20	f	AE	AE3	Passive	0
63	10	20	f	AE	AE4	Passive	1
63	10	20	f	PE	PE1	Passive	1
63	10	20	f	PE	PE2	Passive	0
63	10	20	f	PE	PE3	Passive	0
63	10	20	f	PE	PE4	Passive	1
64	10	19	f	AE	AE1	Passive	1
64	10	19	f	AE	AE2	Passive	0
64	10	19	f	AE	AE3	Passive	1
64	10	19	f	AE	AE4	Passive	1
64	10	19	f	PE	PE1	Passive	1
64	10	19	f	PE	PE2	Passive	1
64	10	19	f	PE	PE3	Passive	1
64	10	19	f	PE	PE4	Passive	0
65	10	19	f	AE	AE1	Active	0
65	10	19	f	AE	AE2	Active	1
65	10	19	f	AE	AE3	Active	1
65	10	19	f	AE	AE4	Active	0
65	10	19	f	PE	PE1	Active	1
65	10	19	f	PE	PE2	Active	0
65	10	19	f	PE	PE3	Active	0
65	10	19	f	PE	PE4	Active	0
66	11	20	f	AE	AE1	Passive	0
66	11	20	f	AE	AE2	Passive	1
66	11	20	f	AE	AE3	Passive	0
66	11	20	f	AE	AE4	Passive	0
66	11	20	f	PE	PE1	Passive	0
66	11	20	f	PE	PE2	Passive	0
66	11	20	f	PE	PE3	Passive	0
66	11	20	f	PE	PE4	Passive	0
67	11	19	f	AE	AE1	Passive	0
67	11	19	f	AE	AE2	Passive	1
67	11	19	f	AE	AE3	Passive	0
67	11	19	f	AE	AE4	Passive	0
67	11	19	f	PE	PE1	Passive	1
67	11	19	f	PE	PE2	Passive	1
67	11	19	f	PE	PE3	Passive	0
67	11	19	f	PE	PE4	Passive	0
68	11	19	m	AE	AE1	Passive	0
68	11	19	m	AE	AE2	Passive	0
68	11	19	m	AE	AE3	Passive	0
68	11	19	m	AE	AE4	Passive	0
68	11	19	m	PE	PE1	Passive	1
68	11	19	m	PE	PE2	Passive	1
68	11	19	m	PE	PE3	Passive	1
68	11	19	m	PE	PE4	Passive	0
69	11	22	f	AE	AE1	Passive	0
69	11	22	f	AE	AE2	Passive	1
69	11	22	f	AE	AE3	Passive	0
69	11	22	f	AE	AE4	Passive	0
69	11	22	f	PE	PE1	Passive	1
69	11	22	f	PE	PE2	Passive	1
69	11	22	f	PE	PE3	Passive	1
69	11	22	f	PE	PE4	Passive	0
70	11	20	f	AE	AE1	Passive	0
70	11	20	f	AE	AE2	Passive	1
70	11	20	f	AE	AE3	Passive	0
70	11	20	f	AE	AE4	Passive	0
70	11	20	f	PE	PE1	Passive	1
70	11	20	f	PE	PE2	Passive	1
70	11	20	f	PE	PE3	Passive	0
70	11	20	f	PE	PE4	Passive	0
71	11	19	f	AE	AE1	Passive	0
71	11	19	f	AE	AE2	Passive	1
71	11	19	f	AE	AE3	Passive	0
71	11	19	f	AE	AE4	Passive	0
71	11	19	f	PE	PE1	Passive	1
71	11	19	f	PE	PE2	Passive	0
71	11	19	f	PE	PE3	Passive	0
71	11	19	f	PE	PE4	Passive	0
72	11	20	f	AE	AE1	Active	0
72	11	20	f	AE	AE2	Active	1
72	11	20	f	AE	AE3	Active	0
72	11	20	f	AE	AE4	Active	0
72	11	20	f	PE	PE1	Active	1
72	11	20	f	PE	PE2	Active	1
72	11	20	f	PE	PE3	Active	0
72	11	20	f	PE	PE4	Active	0
73	12	40	m	AE	AE1	Passive	1
73	12	40	m	AE	AE2	Passive	0
73	12	40	m	AE	AE3	Passive	0
73	12	40	m	AE	AE4	Passive	0
73	12	40	m	PE	PE1	Passive	1
73	12	40	m	PE	PE2	Passive	1
73	12	40	m	PE	PE3	Passive	1
73	12	40	m	PE	PE4	Passive	1
74	12	19	f	AE	AE1	Passive	0
74	12	19	f	AE	AE2	Passive	1
74	12	19	f	AE	AE3	Passive	0
74	12	19	f	AE	AE4	Passive	0
74	12	19	f	PE	PE1	Passive	1
74	12	19	f	PE	PE2	Passive	1
74	12	19	f	PE	PE3	Passive	0
74	12	19	f	PE	PE4	Passive	0
75	12	20	f	AE	AE1	Active	1
75	12	20	f	AE	AE2	Active	1
75	12	20	f	AE	AE3	Active	1
75	12	20	f	AE	AE4	Active	0
75	12	20	f	PE	PE1	Active	1
75	12	20	f	PE	PE2	Active	1
75	12	20	f	PE	PE3	Active	1
75	12	20	f	PE	PE4	Active	0
76	12	19	f	AE	AE1	Passive	0
76	12	19	f	AE	AE2	Passive	0
76	12	19	f	AE	AE3	Passive	0
76	12	19	f	AE	AE4	Passive	0
76	12	19	f	PE	PE1	Passive	1
76	12	19	f	PE	PE2	Passive	1
76	12	19	f	PE	PE3	Passive	0
76	12	19	f	PE	PE4	Passive	0
77	12	23	f	AE	AE1	Passive	0
77	12	23	f	AE	AE2	Passive	1
77	12	23	f	AE	AE3	Passive	0
77	12	23	f	AE	AE4	Passive	0
77	12	23	f	PE	PE1	Passive	1
77	12	23	f	PE	PE2	Passive	1
77	12	23	f	PE	PE3	Passive	0
77	12	23	f	PE	PE4	Passive	0
78	13	19	m	AE	AE1	Passive	0
78	13	19	m	AE	AE2	Passive	0
78	13	19	m	AE	AE3	Passive	0
78	13	19	m	AE	AE4	Passive	0
78	13	19	m	PE	PE1	Passive	0
78	13	19	m	PE	PE2	Passive	1
78	13	19	m	PE	PE3	Passive	1
78	13	19	m	PE	PE4	Passive	0
79	13	20	f	AE	AE1	Passive	0
79	13	20	f	AE	AE2	Passive	1
79	13	20	f	AE	AE3	Passive	0
79	13	20	f	AE	AE4	Passive	0
79	13	20	f	PE	PE1	Passive	1
79	13	20	f	PE	PE2	Passive	1
79	13	20	f	PE	PE3	Passive	1
79	13	20	f	PE	PE4	Passive	1
80	13	28	m	AE	AE1	Active	0
80	13	28	m	AE	AE2	Active	0
80	13	28	m	AE	AE3	Active	0
80	13	28	m	AE	AE4	Active	1
80	13	28	m	PE	PE1	Active	1
80	13	28	m	PE	PE2	Active	1
80	13	28	m	PE	PE3	Active	1
80	13	28	m	PE	PE4	Active	1
81	13	19	f	AE	AE1	Passive	0
81	13	19	f	AE	AE2	Passive	0
81	13	19	f	AE	AE3	Passive	0
81	13	19	f	AE	AE4	Passive	0
81	13	19	f	PE	PE1	Passive	1
81	13	19	f	PE	PE2	Passive	1
81	13	19	f	PE	PE3	Passive	0
81	13	19	f	PE	PE4	Passive	1
82	13	19	f	AE	AE1	Passive	1
82	13	19	f	AE	AE2	Passive	0
82	13	19	f	AE	AE3	Passive	1
82	13	19	f	AE	AE4	Passive	1
82	13	19	f	PE	PE1	Passive	0
82	13	19	f	PE	PE2	Passive	0
82	13	19	f	PE	PE3	Passive	1
82	13	19	f	PE	PE4	Passive	0
83	14	19	f	AE	AE1	Passive	0
83	14	19	f	AE	AE2	Passive	0
83	14	19	f	AE	AE3	Passive	0
83	14	19	f	AE	AE4	Passive	0
83	14	19	f	PE	PE1	Passive	1
83	14	19	f	PE	PE2	Passive	1
83	14	19	f	PE	PE3	Passive	0
83	14	19	f	PE	PE4	Passive	0
84	14	19	f	AE	AE1	Passive	0
84	14	19	f	AE	AE2	Passive	0
84	14	19	f	AE	AE3	Passive	0
84	14	19	f	AE	AE4	Passive	0
84	14	19	f	PE	PE1	Passive	1
84	14	19	f	PE	PE2	Passive	1
84	14	19	f	PE	PE3	Passive	1
84	14	19	f	PE	PE4	Passive	1
85	14	26	f	AE	AE1	Passive	0
85	14	26	f	AE	AE2	Passive	0
85	14	26	f	AE	AE3	Passive	0
85	14	26	f	AE	AE4	Passive	0
85	14	26	f	PE	PE1	Passive	0
85	14	26	f	PE	PE2	Passive	1
85	14	26	f	PE	PE3	Passive	0
85	14	26	f	PE	PE4	Passive	0
86	14	24	f	AE	AE1	Passive	0
86	14	24	f	AE	AE2	Passive	0
86	14	24	f	AE	AE3	Passive	0
86	14	24	f	AE	AE4	Passive	0
86	14	24	f	PE	PE1	Passive	0
86	14	24	f	PE	PE2	Passive	1
86	14	24	f	PE	PE3	Passive	0
86	14	24	f	PE	PE4	Passive	0
87	14	19	f	AE	AE1	Active	0
87	14	19	f	AE	AE2	Active	0
87	14	19	f	AE	AE3	Active	0
87	14	19	f	AE	AE4	Active	0
87	14	19	f	PE	PE1	Active	1
87	14	19	f	PE	PE2	Active	1
87	14	19	f	PE	PE3	Active	0
87	14	19	f	PE	PE4	Active	0
88	14	19	m	AE	AE1	Passive	0
88	14	19	m	AE	AE2	Passive	0
88	14	19	m	AE	AE3	Passive	0
88	14	19	m	AE	AE4	Passive	0
88	14	19	m	PE	PE1	Passive	1
88	14	19	m	PE	PE2	Passive	1
88	14	19	m	PE	PE3	Passive	0
88	14	19	m	PE	PE4	Passive	1
89	15	23	f	AE	AE1	Passive	0
89	15	23	f	AE	AE2	Passive	1
89	15	23	f	AE	AE3	Passive	0
89	15	23	f	AE	AE4	Passive	0
89	15	23	f	PE	PE1	Passive	1
89	15	23	f	PE	PE2	Passive	0
89	15	23	f	PE	PE3	Passive	0
89	15	23	f	PE	PE4	Passive	0
90	15	24	m	AE	AE1	Active	0
90	15	24	m	AE	AE2	Active	0
90	15	24	m	AE	AE3	Active	0
90	15	24	m	AE	AE4	Active	1
90	15	24	m	PE	PE1	Active	1
90	15	24	m	PE	PE2	Active	1
90	15	24	m	PE	PE3	Active	1
90	15	24	m	PE	PE4	Active	1
91	15	26	m	AE	AE1	Passive	1
91	15	26	m	AE	AE2	Passive	0
91	15	26	m	AE	AE3	Passive	1
91	15	26	m	AE	AE4	Passive	1
91	15	26	m	PE	PE1	Passive	0
91	15	26	m	PE	PE2	Passive	1
91	15	26	m	PE	PE3	Passive	0
91	15	26	m	PE	PE4	Passive	1
92	16	23	m	AE	AE1	Active	0
92	16	23	m	AE	AE2	Active	1
92	16	23	m	AE	AE3	Active	0
92	16	23	m	AE	AE4	Active	0
92	16	23	m	PE	PE1	Active	1
92	16	23	m	PE	PE2	Active	0
92	16	23	m	PE	PE3	Active	0
92	16	23	m	PE	PE4	Active	0
93	16	27	m	AE	AE1	Passive	1
93	16	27	m	AE	AE2	Passive	1
93	16	27	m	AE	AE3	Passive	1
93	16	27	m	AE	AE4	Passive	0
93	16	27	m	PE	PE1	Passive	1
93	16	27	m	PE	PE2	Passive	1
93	16	27	m	PE	PE3	Passive	0
93	16	27	m	PE	PE4	Passive	0
94	16	25	f	AE	AE1	Passive	0
94	16	25	f	AE	AE2	Passive	0
94	16	25	f	AE	AE3	Passive	0
94	16	25	f	AE	AE4	Passive	0
94	16	25	f	PE	PE1	Passive	1
94	16	25	f	PE	PE2	Passive	0
94	16	25	f	PE	PE3	Passive	0
94	16	25	f	PE	PE4	Passive	0
95	17	34	f	AE	AE1	Passive	0
95	17	34	f	AE	AE2	Passive	0
95	17	34	f	AE	AE3	Passive	0
95	17	34	f	AE	AE4	Passive	0
95	17	34	f	PE	PE1	Passive	0
95	17	34	f	PE	PE2	Passive	1
95	17	34	f	PE	PE3	Passive	0
95	17	34	f	PE	PE4	Passive	1
96	17	23	f	AE	AE1	Active	0
96	17	23	f	AE	AE2	Active	0
96	17	23	f	AE	AE3	Active	0
96	17	23	f	AE	AE4	Active	0
96	17	23	f	PE	PE1	Active	1
96	17	23	f	PE	PE2	Active	1
96	17	23	f	PE	PE3	Active	0
96	17	23	f	PE	PE4	Active	0
97	17	23	f	AE	AE1	Passive	0
97	17	23	f	AE	AE2	Passive	1
97	17	23	f	AE	AE3	Passive	0
97	17	23	f	AE	AE4	Passive	0
97	17	23	f	PE	PE1	Passive	1
97	17	23	f	PE	PE2	Passive	1
97	17	23	f	PE	PE3	Passive	0
97	17	23	f	PE	PE4	Passive	0
